# Supplementary material
Source: PubMed Central journal article supplement (PMC5743448)
Supplement: EHP864.s001.acco.pdf [file EHP864.s001.acco.pdf]

**Note to readers with disabilities:** *EHP* strives to ensure that all journal content is accessible to all readers. However, some figures and Supplemental Material published in *EHP* articles may not conform to [508 standards](#) due to the complexity of the information being presented. If you need assistance accessing journal content, please contact [ehponline@niehs.nih.gov](mailto:ehponline@niehs.nih.gov). Our staff will work with you to assess and meet your accessibility needs within 3 working days.

## **Supplemental Material**

### **Parental Occupational Exposure to Organic Solvents and Testicular Germ Cell Tumors in Their Offspring (NORD-TEST Study)**

Charlotte Le Cornet, Béatrice Fervers, Eero Pukkala, Tore Tynes, Maria Feychting, Johnni Hansen, Kayo Togawa, Karl-Christian Nordby, Susanne Oksbjerg Dalton, Sanni Uuksulainen, Pernilla Wiebert, Torill Woldbæk, Niels E. Skakkebak, Ann Olsson, Joachim Schüz

#### **Table of Contents**

|          |                                                                                                                                                                                                |
|----------|------------------------------------------------------------------------------------------------------------------------------------------------------------------------------------------------|
| Table S1 | The cut-offs of paternal and maternal solvent exposure                                                                                                                                         |
| Fig. S1  | SAS output representing the distribution of methylene chloride level of exposure among mothers exposed, and the distribution of 1,1,1-trichloroethane level of exposure among fathers exposed. |
| Table S2 | Correlation matrix between different solvents for which the parents are occupationally exposed                                                                                                 |
| Table S3 | Paternal and maternal exposure to solvents prior to birth and risk to develop testicular cancer unadjusted and adjusted for potential confounders                                              |
| Table S4 | Paternal exposure to solvents prior to the child's birth and testicular germ cell tumour risk in the offspring stratified by country                                                           |
| Table S5 | Risk of testicular germ cell tumour stratified by subtypes in relation to maternal and paternal prenatal exposure to solvents.                                                                 |

Table S1: The cut-offs of paternal and maternal solvent exposure

|                       | 75th percentiles values for mothers' exposures (in ppm) | 90th percentiles values of fathers' exposures (in ppm) |
|-----------------------|---------------------------------------------------------|--------------------------------------------------------|
| Benzene               | 0.20                                                    | 0.30                                                   |
| Toluene               | 6.00                                                    | 24.00                                                  |
| Methylene chloride    | 1.50                                                    | 1.50                                                   |
| Perchloroethylene     | 3.00                                                    | 3.00                                                   |
| Trichloroethylene     | 1.20                                                    | 1.20                                                   |
| 1,1,1-trichloroethane | 0.75                                                    | 0.80                                                   |

Fig. S1: SAS output representing the distribution of methylene chloride level of exposure among mothers exposed, and the distribution of 1,1,1-trichloroethane level of exposure among fathers exposed.

Distribution of methylene chloride among mother exposed

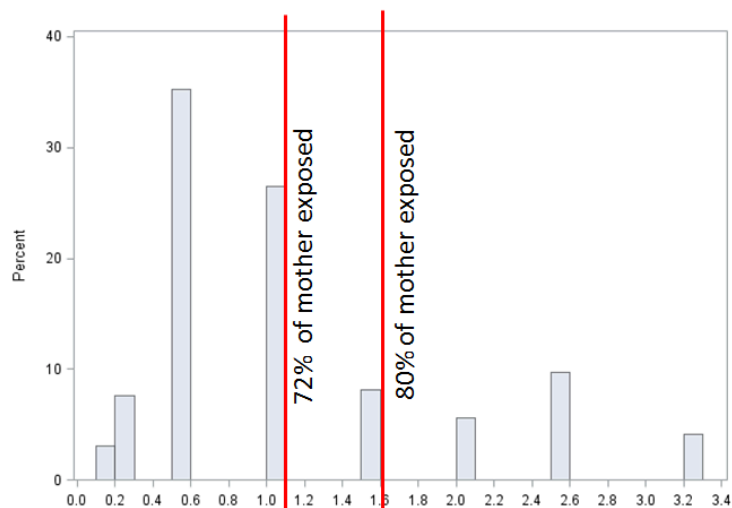

75<sup>th</sup> percentiles values for mothers' exposures is not available.  
the cut-off was performed at the 72<sup>th</sup> percentile giving two categories  
0.1 to 1, and 1.5 to 3.2

Distribution of 1,1,1-trichloroethane among father exposed

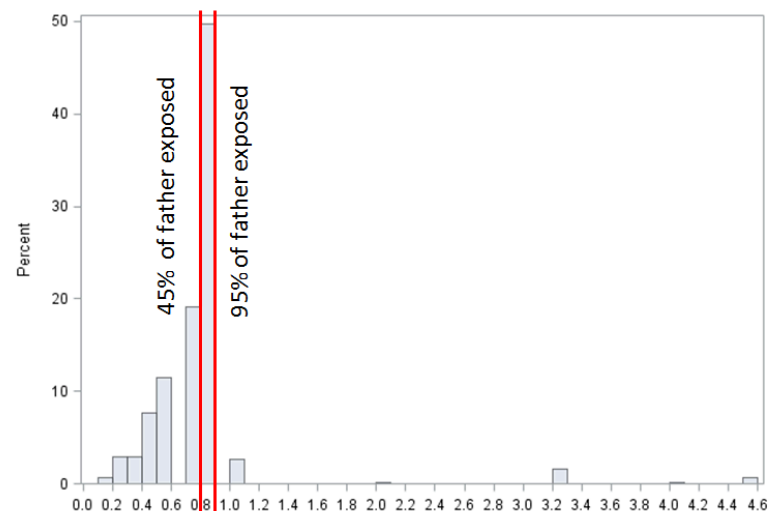

90<sup>th</sup> percentiles values for fathers' exposures is not available. And the number of father with an exposure level of 0.8 represent half the father's population  
the cut-off was performed at the 45<sup>th</sup> percentile giving two categories  
0.1 to 0.75, and 0.8 to 4.5

Table S2: Correlation matrix between different solvents for which the parents are occupationally exposed

|                          | Benzene | Toluene | Methylene chloride | Perchloroethylene | Trichloroethylene | 1,1,1-trichloroethane |
|--------------------------|---------|---------|--------------------|-------------------|-------------------|-----------------------|
| <b>Maternal exposure</b> |         |         |                    |                   |                   |                       |
| Benzene                  | 1.00    | 0.57    | 0.22               | 0.12              | 0.15              | 0.12                  |
| Toluene                  | 0.57    | 1.00    | 0.41               | 0.00              | 0.08              | 0.30                  |
| Methylene chloride       | 0.22    | 0.41    | 1.00               | 0.24              | 0.17              | 0.53                  |
| Perchloroethylene        | 0.12    | 0.00    | 0.24               | 1.00              | 0.72              | 0.55                  |
| Trichloroethylene        | 0.15    | 0.08    | 0.17               | 0.72              | 1.00              | 0.73                  |
| 1,1,1-trichloroethane    | 0.12    | 0.30    | 0.53               | 0.55              | 0.73              | 1.00                  |
| <b>Paternal exposure</b> |         |         |                    |                   |                   |                       |
| Benzene                  | 1.00    | 0.89    | 0.81               | -0.01             | 0.03              | 0.60                  |
| Toluene                  | 0.89    | 1.00    | 0.85               | -0.01             | 0.02              | 0.65                  |
| Methylene chloride       | 0.81    | 0.85    | 1.00               | 0.09              | 0.05              | 0.73                  |
| Perchloroethylene        | -0.01   | -0.01   | 0.09               | 1.00              | 0.39              | 0.28                  |
| Trichloroethylene        | 0.03    | 0.02    | 0.05               | 0.39              | 1.00              | 0.56                  |
| 1,1,1-trichloroethane    | 0.60    | 0.65    | 0.73               | 0.28              | 0.56              | 1.00                  |

Binary solvent exposure variables (no, yes) were used to measure the correlation coefficients (Phi).

Table S3: Paternal and maternal exposure to solvents prior to birth and risk to develop testicular cancer unadjusted and adjusted for potential confounders

|                                        | Maternal exposure |             |                          |                           | Paternal exposure |              |                          |                                   |
|----------------------------------------|-------------------|-------------|--------------------------|---------------------------|-------------------|--------------|--------------------------|-----------------------------------|
|                                        | Cases             | Controls    | OR (95% CI) <sup>a</sup> | AOR (95% CI) <sup>b</sup> | Cases             | Controls     | OR (95% CI) <sup>a</sup> | AOR (95% CI) <sup>b</sup>         |
|                                        | n (%)             | n (%)       |                          |                           | n (%)             | n (%)        |                          |                                   |
| Aromatic hydrocarbon solvents (ARHC)   |                   |             |                          |                           |                   |              |                          |                                   |
| Any of ARHC solvents <sup>c</sup>      |                   |             |                          |                           |                   |              |                          |                                   |
|                                        | Unexposed         | 6914 (98.5) | 22794 (98.8)             |                           | 7243 (92.2)       | 23545 (92.3) |                          |                                   |
|                                        | Exposed           | 104 (1.5)   | 287 (1.2)                | 1.23 (0.97,1.55)          | 1.20 (0.94,1.52)  | 612 (7.8)    | 1951 (7.7)               | 1.02 (0.92,1.12) 1.02 (0.93,1.12) |
| <i>Benzene</i>                         |                   |             |                          |                           |                   |              |                          |                                   |
|                                        | Unexposed         | 6932 (98.8) | 22840 (99)               |                           | 7315 (93.1)       | 23810 (93.4) |                          |                                   |
|                                        | Exposed           | 86 (1.2)    | 241 (1)                  | 1.18 (0.91,1.52)          | 1.15 (0.89,1.49)  | 540 (6.9)    | 1686 (6.6)               | 1.03 (0.93,1.14) 1.03 (0.93,1.14) |
| <i>Toluene</i>                         |                   |             |                          |                           |                   |              |                          |                                   |
|                                        | Unexposed         | 6963 (99.2) | 22921 (99.3)             |                           | 7274 (92.6)       | 23644 (92.7) |                          |                                   |
|                                        | Exposed           | 55 (0.8)    | 160 (0.7)                | 1.22 (0.88,1.68)          | 1.21 (0.88,1.67)  | 581 (7.4)    | 1852 (7.3)               | 1.02 (0.92,1.12) 1.02 (0.92,1.12) |
| Chlorinated hydrocarbon solvents (CHC) |                   |             |                          |                           |                   |              |                          |                                   |
| Any of CHC solvents <sup>d</sup>       |                   |             |                          |                           |                   |              |                          |                                   |
|                                        | Unexposed         | 6910 (98.5) | 22737 (98.5)             |                           | 6888 (87.7)       | 22524 (88.3) |                          |                                   |
|                                        | Exposed           | 108 (1.5)   | 344 (1.5)                | 1.05 (0.84,1.31)          | 1.01 (0.80,1.26)  | 967 (12.3)   | 2972 (11.7)              | 1.07 (0.99,1.16) 1.07 (0.99,1.16) |
| <i>Methylene chloride</i>              |                   |             |                          |                           |                   |              |                          |                                   |
|                                        | Unexposed         | 6964 (99.2) | 22939 (99.4)             |                           | 7322 (93.2)       | 23848 (93.5) |                          |                                   |
|                                        | Exposed           | 54 (0.8)    | 142 (0.6)                | 1.34 (0.97,1.85)          | 1.33 (0.96,1.84)  | 533 (6.8)    | 1648 (6.5)               | 1.05 (0.95,1.16) 1.05 (0.95,1.16) |
| <i>Perchloroethylene</i>               |                   |             |                          |                           |                   |              |                          |                                   |
|                                        | Unexposed         | 6977 (99.4) | 22956 (99.5)             |                           | 7763 (98.8)       | 25220 (98.9) |                          |                                   |
|                                        | Exposed           | 41 (0.6)    | 125 (0.5)                | 1.10 (0.77,1.57)          | 1.01 (0.68,1.44)  | 92 (1.2)     | 276 (1.1)                | 1.07 (0.84,1.36) 1.07 (0.84,1.37) |
| <i>Trichloroethylene</i>               |                   |             |                          |                           |                   |              |                          |                                   |
|                                        | Unexposed         | 6958 (99.1) | 22866 (99.1)             |                           | 7396 (94.2)       | 24073 (94.4) |                          |                                   |
|                                        | Exposed           | 60 (0.9)    | 215 (0.9)                | 0.92 (0.69,1.24)          | 0.85 (0.63,1.15)  | 459 (5.8)    | 1423 (5.6)               | 1.09 (0.97,1.21) 1.09 (0.97,1.21) |
| <i>1,1,1-trichloroethane</i>           |                   |             |                          |                           |                   |              |                          |                                   |
|                                        | Unexposed         | 6937 (98.8) | 22815 (98.8)             |                           | 7017 (89.3)       | 22937 (90.0) |                          |                                   |
|                                        | Exposed           | 81 (1.2)    | 266 (1.2)                | 1.03 (0.8,1.32)           | 1.00 (0.77,1.29)  | 838 (10.7)   | 2559 (10.0)              | 1.08 (1.00,1.18) 1.09 (1.00,1.18) |
| <i>Any solvent<sup>e</sup></i>         |                   |             |                          |                           |                   |              |                          |                                   |
|                                        | Unexposed         | 6841 (97.5) | 22565 (97.8)             |                           | 6789 (86.4)       | 22181 (87.0) |                          |                                   |
|                                        | Exposed           | 177 (2.5)   | 516 (2.2)                | 1.15 (0.96,1.38)          | 1.12 (0.94,1.35)  | 1066 (13.6)  | 3315 (13.0)              | 1.06 (0.98,1.15) 1.06 (0.99,1.15) |

Abbreviations: CI, confidence interval; n, number; OR, odds ratio; AOR, Adjusted odds ratio.

<sup>a</sup>ORs and its corresponding 95% CI were derived based on logistic regression analysis conditional on year and country of child's birth, the reference category (unexposed) was the parents that were not occupationally exposed to the solvent of interest.

<sup>b</sup>Model adjusted for Age of father at birth, age of mother at birth, and family history of testicular cancer (father and/or brother(s)).

<sup>c</sup>Benzene and/or toluene.

<sup>d</sup>Methylene chloride, perchloroethylene, trichloroethylene, and/or 1,1,1-trichloroethane.

<sup>e</sup>At least one of the following solvents: benzene, toluene, methylene chloride, perchloroethylene, trichloroethylene, 1,1,1-trichloroethane.

Table S4: Paternal exposure to solvents prior to the child's birth and testicular germ cell tumour risk in the offspring stratified by country

|                                        | Finland      |                 |                          | Norway       |                 |                          | Sweden       |                 |                          |
|----------------------------------------|--------------|-----------------|--------------------------|--------------|-----------------|--------------------------|--------------|-----------------|--------------------------|
|                                        | Cases<br>(n) | Controls<br>(n) | OR (95% CI) <sup>a</sup> | Cases<br>(n) | Controls<br>(n) | OR (95% CI) <sup>a</sup> | Cases<br>(n) | Controls<br>(n) | OR (95% CI) <sup>a</sup> |
| Aromatic hydrocarbon solvents (ARHC)   |              |                 |                          |              |                 |                          |              |                 |                          |
| Any of ARHC solvents <sup>b</sup>      |              |                 |                          |              |                 |                          |              |                 |                          |
| Unexposed                              | 950          | 3739            |                          | 2770         | 8011            |                          | 3523         | 11795           |                          |
| Exposed                                | 57           | 245             | 0.91 (0.68,1.23)         | 260          | 705             | 1.08 (0.93,1.26)         | 295          | 1001            | 0.99 (0.87,1.14)         |
| <i>Benzene</i>                         |              |                 |                          |              |                 |                          |              |                 |                          |
| Unexposed                              | 968          | 3,820           |                          | 2,795        | 8,090           |                          | 3,552        | 11,900          |                          |
| Exposed                                | 39           | 164             | 0.93 (0.65,1.33)         | 235          | 626             | 1.10 (0.94,1.29)         | 266          | 896             | 1.00 (0.87,1.16)         |
| <i>Toluene</i>                         |              |                 |                          |              |                 |                          |              |                 |                          |
| Unexposed                              | 956          | 3,757           |                          | 2,783        | 8,043           |                          | 3,535        | 11,844          |                          |
| Exposed                                | 51           | 227             | 0.88 (0.65,1.20)         | 247          | 673             | 1.07 (0.92,1.25)         | 283          | 952             | 1.00 (0.87,1.15)         |
| Chlorinated hydrocarbon solvents (CHC) |              |                 |                          |              |                 |                          |              |                 |                          |
| Any of CHC solvents <sup>c</sup>       |              |                 |                          |              |                 |                          |              |                 |                          |
| Unexposed                              | 912          | 3672            |                          | 2712         | 7848            |                          | 3264         | 11004           |                          |
| Exposed                                | 95           | 312             | 1.21 (0.95,1.54)         | 318          | 868             | 1.08 (0.94,1.24)         | 554          | 1792            | 1.05 (0.94,1.16)         |
| <i>Methylene chloride</i>              |              |                 |                          |              |                 |                          |              |                 |                          |
| Unexposed                              | 958          | 3,790           |                          | 2,826        | 8,173           |                          | 3,538        | 11,885          |                          |
| Exposed                                | 49           | 194             | 0.99 (0.72,1.37)         | 204          | 543             | 1.09 (0.92,1.29)         | 280          | 911             | 1.03 (0.90,1.19)         |
| <i>Perchloroethylene</i>               |              |                 |                          |              |                 |                          |              |                 |                          |
| Unexposed                              | 989          | 3,956           |                          | 3,001        | 8,623           |                          | 3,773        | 12,641          |                          |
| Exposed                                | 18           | 28              | 2.42 (1.32,4.41)         | 29           | 93              | 0.90 (0.59,1.37)         | 45           | 155             | 0.95 (0.68,1.34)         |
| <i>Trichloroethylene</i>               |              |                 |                          |              |                 |                          |              |                 |                          |
| Unexposed                              | 940          | 3,768           |                          | 2,924        | 8,413           |                          | 3,532        | 11,892          |                          |
| Exposed                                | 67           | 216             | 1.21 (0.91,1.60)         | 106          | 303             | 1.06 (0.84,1.34)         | 286          | 904             | 1.07 (0.93,1.23)         |
| <i>1,1,1-trichloroethane</i>           |              |                 |                          |              |                 |                          |              |                 |                          |
| Unexposed                              | 915          | 3,693           |                          | 2,773        | 8,019           |                          | 3,329        | 11,225          |                          |
| Exposed                                | 92           | 291             | 1.26 (0.98,1.61)         | 257          | 697             | 1.08 (0.93,1.26)         | 489          | 1571            | 1.05 (0.94,1.18)         |
| <i>Any solvent<sup>d</sup></i>         |              |                 |                          |              |                 |                          |              |                 |                          |
| Unexposed                              | 898          | 3602            |                          | 2661         | 7698            |                          | 3230         | 10881           |                          |
| Exposed                                | 109          | 382             | 1.13 (0.90,1.42)         | 369          | 1018            | 1.08 (0.95,1.23)         | 588          | 1915            | 1.04 (0.94,1.15)         |

Abbreviations: CI, confidence interval; n, number; OR, odds ratio.

<sup>a</sup>ORs and its corresponding 95% CI were derived based on logistic regression analysis conditional on year and country of child's birth, the reference category (unexposed) was the parents that were not occupationally exposed to the solvent of interest.

<sup>b</sup>Benzene and/or toluene.

<sup>c</sup>Methylene chloride, perchloroethylene, trichloroethylene, and/or 1,1,1-trichloroethane.

<sup>d</sup>At least one of the following solvents: benzene, toluene, methylene chloride, perchloroethylene, trichloroethylene, 1,1,1-trichloroethane.

Table S5: Risk of testicular germ cell tumour stratified by subtypes in relation to maternal and paternal prenatal exposure to solvents.

|                                        | Non-Seminoma   |                   |                          | Seminoma       |                   |                          |
|----------------------------------------|----------------|-------------------|--------------------------|----------------|-------------------|--------------------------|
|                                        | Cases<br>n (%) | Controls<br>n (%) | OR (95% CI) <sup>a</sup> | Cases<br>n (%) | Controls<br>n (%) | OR (95% CI) <sup>a</sup> |
| <b>Maternal exposure</b>               |                |                   |                          |                |                   |                          |
| Aromatic hydrocarbon solvents (ARHC)   |                |                   |                          |                |                   |                          |
| Any of ARHC solvents <sup>b</sup>      |                |                   |                          |                |                   |                          |
| Unexposed                              | 3854 (98.5)    | 12732 (98.7)      |                          | 3060 (98.5)    | 10062 (98.9)      |                          |
| Exposed                                | 57 (1.5)       | 171 (1.3)         | 1.11 (0.82,1.52)         | 47 (1.5)       | 116 (1.1)         | 1.39 (0.98,1.98)         |
| <i>Benzene</i>                         |                |                   |                          |                |                   |                          |
| Unexposed                              | 3,866 (98.8)   | 12,762 (98.9)     |                          | 3,066 (98.7)   | 10,078 (99.0)     |                          |
| Exposed                                | 45 (1.2)       | 141 (1.1)         | 1.03 (0.73,1.46)         | 41 (1.3)       | 100 (1.0)         | 1.39 (0.95,2.04)         |
| <i>Toluene</i>                         |                |                   |                          |                |                   |                          |
| Unexposed                              | 3,879 (99.2)   | 12,804 (99.2)     |                          | 3,084 (99.3)   | 10,117 (99.4)     |                          |
| Exposed                                | 32 (0.8)       | 99 (0.8)          | 1.10 (0.73,1.68)         | 23 (0.7)       | 61 (0.6)          | 1.41 (0.86,2.33)         |
| Chlorinated hydrocarbon solvents (CHC) |                |                   |                          |                |                   |                          |
| Any of CHC solvents <sup>c</sup>       |                |                   |                          |                |                   |                          |
| Unexposed                              | 3851 (98.5)    | 12701 (98.4)      |                          | 3059 (98.5)    | 10036 (98.6)      |                          |
| Exposed                                | 60 (1.5)       | 202 (1.6)         | 1.02 (0.76,1.37)         | 48 (1.5)       | 142 (1.4)         | 1.10 (0.79,1.54)         |
| <i>Methylene chloride</i>              |                |                   |                          |                |                   |                          |
| Unexposed                              | 3,876 (99.1)   | 12,808 (99.3)     |                          | 3,088 (99.4)   | 10,131 (99.5)     |                          |
| Exposed                                | 35 (0.9)       | 95 (0.7)          | 1.34 (0.89,2.00)         | 19 (0.6)       | 47 (0.5)          | 1.35 (0.79,2.33)         |
| <i>Perchloroethylene</i>               |                |                   |                          |                |                   |                          |
| Unexposed                              | 3,886 (99.4)   | 12,830 (99.4)     |                          | 3,091 (99.5)   | 10,126 (99.5)     |                          |
| Exposed                                | 25 (0.6)       | 73 (0.6)          | 1.19 (0.75,1.89)         | 16 (0.5)       | 52 (0.5)          | 0.98 (0.55,1.73)         |
| <i>Trichloroethylene</i>               |                |                   |                          |                |                   |                          |
| Unexposed                              | 3,880 (99.2)   | 12,785 (99.1)     |                          | 3,078 (99.1)   | 10,081 (99.0)     |                          |
| Exposed                                | 31 (0.8)       | 118 (0.9)         | 0.89 (0.59,1.34)         | 29 (0.9)       | 97 (1.0)          | 0.96 (0.63,1.46)         |
| <i>1,1,1, trichloroethane</i>          |                |                   |                          |                |                   |                          |
| Unexposed                              | 3,864 (98.8)   | 12,742 (98.8)     |                          | 3,073 (98.9)   | 10,073 (99.0)     |                          |
| Exposed                                | 47 (1.2)       | 161 (1.2)         | 1.00 (0.72,1.40)         | 34 (1.1)       | 105 (1.0)         | 1.06 (0.72,1.57)         |
| <i>Any solvent</i> <sup>d</sup>        |                |                   |                          |                |                   |                          |
| Unexposed                              | 3811 (97.4)    | 12604 (97.7)      |                          | 3030 (97.5)    | 9961 (97.9)       |                          |
| Exposed                                | 100 (2.6)      | 299 (2.3)         | 1.12 (0.89,1.42)         | 77 (2.5)       | 217 (2.1)         | 1.19 (0.91,1.56)         |
| <b>Paternal exposure</b>               |                |                   |                          |                |                   |                          |
| Aromatic hydrocarbon solvents (ARHC)   |                |                   |                          |                |                   |                          |
| Any of ARHC solvents <sup>b</sup>      |                |                   |                          |                |                   |                          |
| Unexposed                              | 3958 (92.2)    | 12908 (92.5)      |                          | 3285 (92.2)    | 10637 (92.2)      |                          |
| Exposed                                | 333 (7.8)      | 1051 (7.5)        | 1.03 (0.91,1.18)         | 279 (7.8)      | 900 (7.8)         | 1.00 (0.87,1.15)         |
| <i>Benzene</i>                         |                |                   |                          |                |                   |                          |
| Unexposed                              | 4,002 (93.3)   | 13,077 (93.7)     |                          | 3,313 (93.0)   | 10,733 (93.0)     |                          |
| Exposed                                | 289 (6.7)      | 882 (6.3)         | 1.06 (0.92,1.22)         | 251 (7.0)      | 804 (7.0)         | 1.00 (0.87,1.17)         |
| <i>Toluene</i>                         |                |                   |                          |                |                   |                          |
| Unexposed                              | 3,977 (92.7)   | 12,953 (92.8)     |                          | 3,297 (92.5)   | 10,691 (92.7)     |                          |
| Exposed                                | 314 (7.3)      | 1,006 (7.2)       | 1.01 (0.89,1.16)         | 267 (7.5)      | 846 (7.3)         | 1.02 (0.88,1.18)         |
| Chlorinated hydrocarbon solvents (CHC) |                |                   |                          |                |                   |                          |
| Any of CHC solvents <sup>c</sup>       |                |                   |                          |                |                   |                          |
| Unexposed                              | 3758 (87.6)    | 12315 (88.2)      |                          | 3130 (87.8)    | 10209 (88.5)      |                          |
| Exposed                                | 533 (12.4)     | 1644 (11.8)       | 1.08 (0.97,1.2)          | 434 (12.2)     | 1328 (11.5)       | 1.06 (0.95,1.20)         |
| <i>Methylene chloride</i>              |                |                   |                          |                |                   |                          |
| Unexposed                              | 3,999 (93.2)   | 13,024 (93.3)     |                          | 3,323 (93.2)   | 10,824 (93.8)     |                          |
| Exposed                                | 292 (6.8)      | 935 (6.7)         | 1.02 (0.89,1.17)         | 241 (6.8)      | 713 (6.2)         | 1.09 (0.94,1.27)         |

|                                | Non-Seminoma   |                   |                          | Seminoma       |                   |                          |
|--------------------------------|----------------|-------------------|--------------------------|----------------|-------------------|--------------------------|
|                                | Cases<br>n (%) | Controls<br>n (%) | OR (95% CI) <sup>a</sup> | Cases<br>n (%) | Controls<br>n (%) | OR (95% CI) <sup>a</sup> |
| <i>Perchloroethylene</i>       |                |                   |                          |                |                   |                          |
| Unexposed                      | 4,239 (98.8)   | 13,790 (98.8)     |                          | 3,524 (98.9)   | 11,430 (99.1)     |                          |
| Exposed                        | 52 (1.2)       | 169 (1.2)         | 1.01 (0.74,1.39)         | 40 (1.1)       | 107 (0.9)         | 1.15 (0.79,1.67)         |
| <i>Trichloroethylene</i>       |                |                   |                          |                |                   |                          |
| Unexposed                      | 4,029 (93.9)   | 13,175 (94.4)     |                          | 3,367 (94.5)   | 10,898 (94.5)     |                          |
| Exposed                        | 262 (6.1)      | 784 (5.6)         | 1.15 (0.99,1.33)         | 197 (5.5)      | 639 (5.5)         | 1.01 (0.86,1.20)         |
| <i>1,1,1-trichloroethane</i>   |                |                   |                          |                |                   |                          |
| Unexposed                      | 3,822 (89.1)   | 12,541 (89.8)     |                          | 3,195 (89.6)   | 10,396 (90.1)     |                          |
| Exposed                        | 469 (10.9)     | 1,418 (10.2)      | 1.11 (0.99,1.24)         | 369 (10.4)     | 1,141 (9.9)       | 1.06 (0.93,1.20)         |
| <i>Any solvent<sup>d</sup></i> |                |                   |                          |                |                   |                          |
| Unexposed                      | 3704 (86.3)    | 12153 (87.1)      |                          | 3085 (86.6)    | 10028 (86.9)      |                          |
| Exposed                        | 587 (13.7)     | 1806 (12.9)       | 1.09 (0.98,1.20)         | 479 (13.4)     | 1509 (13.1)       | 1.03 (0.92,1.16)         |

Abbreviations: CI, confidence interval; n, number; OR, odds ratio.

<sup>a</sup> ORs and its corresponding 95% CI were derived based on logistic regression analysis conditional on year and country of child's birth, the reference category (unexposed) was the parents that were not occupationally exposed to the solvent of interest.

<sup>b</sup> Benzene and/or toluene.

<sup>c</sup> Methylene chloride, perchloroethylene, trichloroethylene, and/or 1,1,1-trichloroethane.

<sup>d</sup> At least one of the following solvents: benzene, toluene, methylene chloride, perchloroethylene, trichloroethylene, 1,1,1-trichloroethane.
